# Supplementary material for: Spontaneous mutation rate estimates for the principal malaria vectors Anopheles coluzzii and Anopheles stephensi
Source: PubMed Central journal article supplement (PMC8742016; doi:10.1038/s41598-021-03943-z), 2022-01-07
Supplement: 41598_2021_3943_MOESM1_ESM.pdf [file 41598_2021_3943_MOESM1_ESM.pdf]

# Supplementary Material

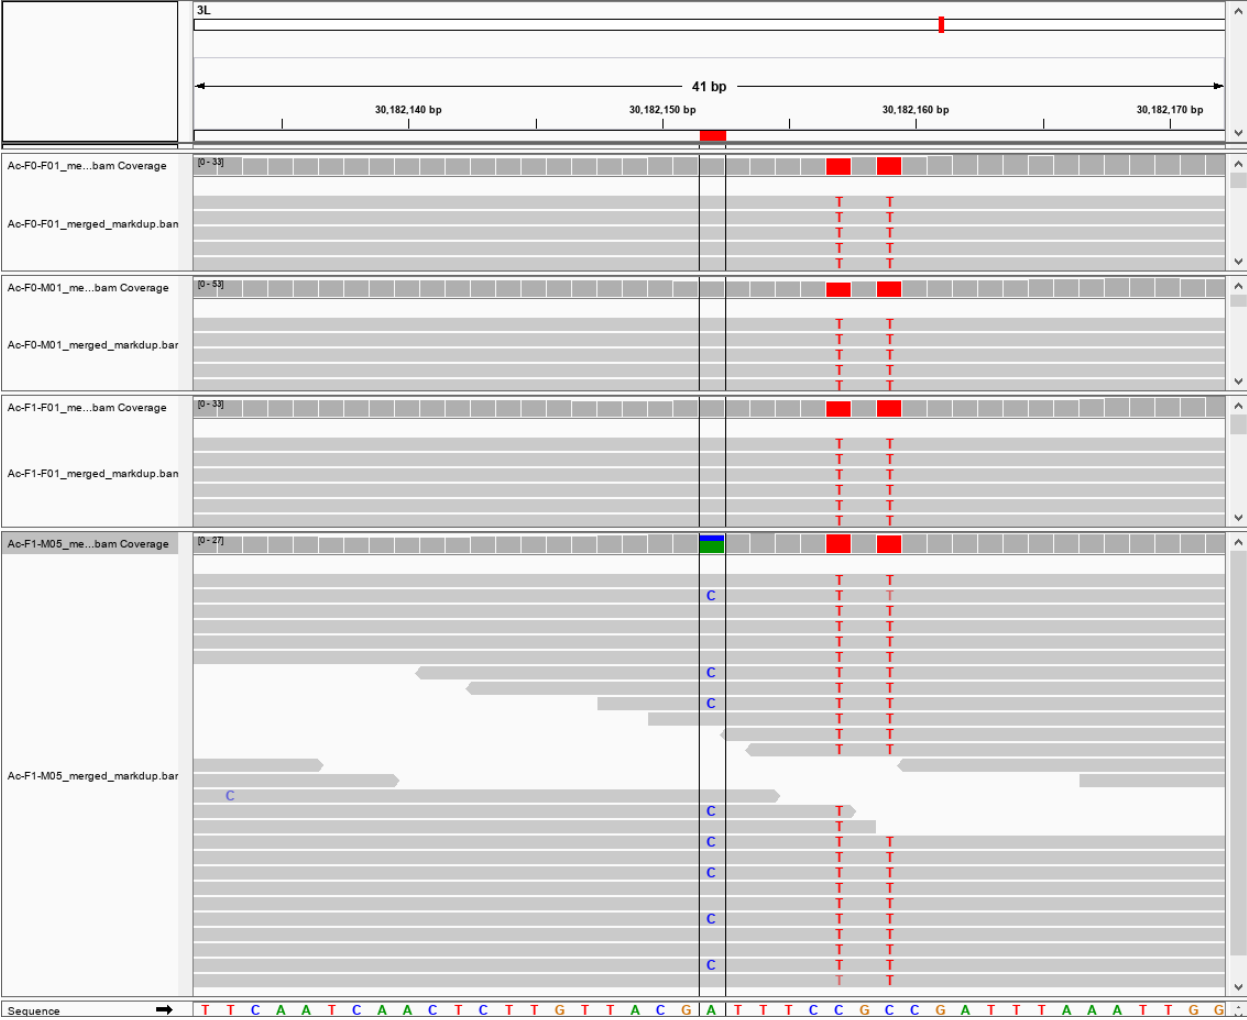

**Supplementary Fig. 1 IGV screenshot of acceptable *de novo* mutation candidate example.** Aligned sequence reads are visible as grey horizontal bands. Variant nucleotides are depicted in color at their respective positions. The top two panels show aligned reads of parents. A pair of central vertical lines encloses the identified mutation in a focal offspring (Ac-F1-M05), on chromosome 3L. The mutation is unique to the focal offspring in question and does not segregate with any adjacent substitution/indel on the same reads. Outside the center lines are two C→T substitutions homozygous in both parents and offspring.

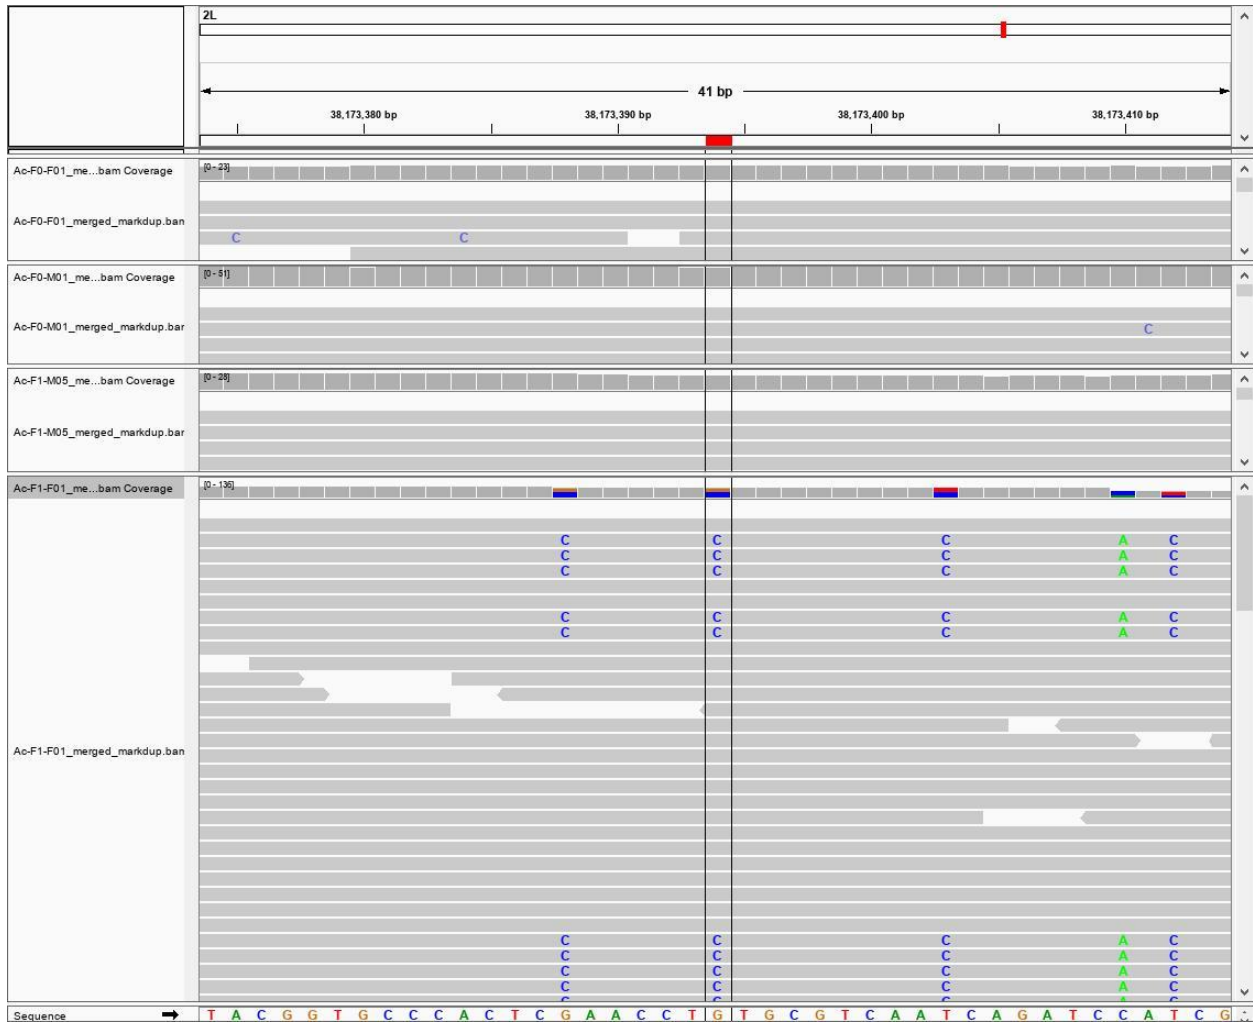

**Supplementary Fig. 2 IGV screenshot of unacceptable *de novo* mutation candidate example.** Aligned sequence reads are visible as grey horizontal bands. Variant nucleotides are depicted in color at their respective positions. The top two panels show aligned reads of parents. A pair of central vertical lines encloses an identified mutation in a focal offspring (Ac-F1-F01) on chromosome 2L. There are multiple variant for this offspring on that genomic region that are not present on the parents, thus considered as artifacts and false positive.

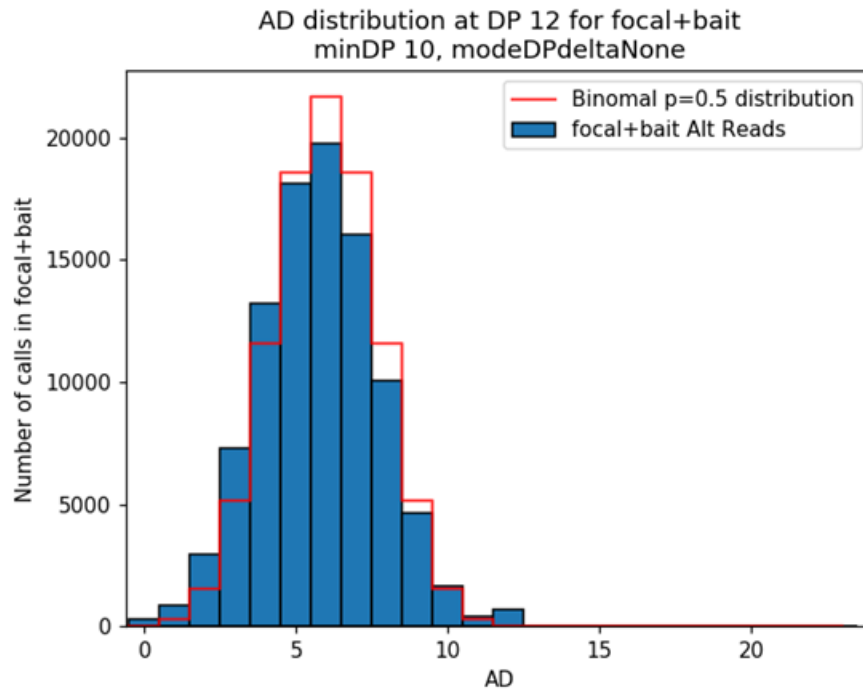

**Supplementary Fig. 3 Alternate allele depth and binomial distributions.** Example of distribution of number of sites in all offspring (focal + bait) showing different values of alternate allele depth (AD) for read depth (DP) = 12.

**Supplementary Table 1. *Anopheles coluzzii* whole genome sequencing information.**

Number of raw reads, mapped reads and NCBI accession number for each sample.

| <b>Sample Name</b> | <b>Raw Reads</b> | <b>Mapped Reads</b> | <b>% Mapped</b> | <b>Mean Coverage</b> | <b>Sample Type</b> | <b>Accession Number</b> |
|--------------------|------------------|---------------------|-----------------|----------------------|--------------------|-------------------------|
| Ac-F0-F01          | 97140913         | 45489817            | 46.83%          | 20.5963              | parent             | SAMN19355128            |
| Ac-F0-M01          | 103341843        | 101637716           | 98.35%          | 45.1053              | parent             | SAMN19355129            |
| Ac-F0-M02          | 60835790         | 60265105            | 99.06%          | 27.7418              | parent             | SAMN19355130            |
| Ac-F0-M03          | 61386017         | 60521358            | 98.59%          | 27.2453              | parent             | SAMN19355131            |
| Ac-F0-M04          | 69292077         | 67321258            | 97.16%          | 30.26                | parent             | SAMN19355132            |
| Ac-F1-M12          | 52232611         | 51793031            | 99.16%          | 23.5697              | focal              | SAMN19355141            |
| Ac-F1-F01          | 58181099         | 49312578            | 84.76%          | 22.6875              | focal              | SAMN19355153            |
| Ac-F1-F08          | 73278387         | 72595327            | 99.07%          | 33.1159              | focal              | SAMN19355150            |
| Ac-F1-F09          | 94273164         | 56766077            | 60.21%          | 25.602               | focal              | SAMN19355151            |
| Ac-F1-F10          | 71110716         | 55405601            | 77.91%          | 25.1209              | focal              | SAMN19355152            |
| Ac-F1-F13          | 110058282        | 1840775             | 1.67%           | 0.4933               | focal              | SAMN19355156            |
| Ac-F1-M01          | 76915421         | 59766572            | 77.70%          | 27.1498              | focal              | SAMN19355157            |
| Ac-F1-M02          | 67304960         | 66750852            | 99.18%          | 30.2942              | focal              | SAMN19355158            |
| Ac-F1-M03          | 59789278         | 59305240            | 99.19%          | 27.1593              | focal              | SAMN19355159            |
| Ac-F1-M04          | 51570146         | 51140260            | 99.17%          | 23.5429              | focal              | SAMN19355160            |
| Ac-F1-M05          | 48474172         | 48056314            | 99.14%          | 22.0738              | focal              | SAMN19355161            |
| Ac-F1-F14          | 41437727         | 28051181            | 67.69%          | 12.7125              | bait               | SAMN19355133            |
| Ac-F1-F02          | 31522936         | 31079182            | 98.59%          | 14.2498              | bait               | SAMN19355145            |
| Ac-F1-F11          | 87944465         | 20890255            | 23.75%          | 9.5483               | bait               | SAMN19355154            |
| Ac-F1-F12          | 91105174         | 39712994            | 43.59%          | 17.8925              | bait               | SAMN19355155            |
| Ac-F1-F15          | 35372035         | 31374599            | 88.70%          | 14.3567              | bait               | SAMN19355134            |
| Ac-F1-F16          | 43488216         | 38829424            | 89.29%          | 17.6019              | bait               | SAMN19355135            |
| Ac-F1-F17          | 22030445         | 21824248            | 99.06%          | 10.1544              | bait               | SAMN19355136            |
| Ac-F1-F18          | 25738247         | 25466756            | 98.95%          | 11.8689              | bait               | SAMN19355137            |
| Ac-F1-F19          | 39722485         | 39319605            | 98.99%          | 18.0755              | bait               | SAMN19355138            |
| Ac-F1-F20          | 38087731         | 35954639            | 94.40%          | 16.4626              | bait               | SAMN19355139            |
| Ac-F1-M06          | 27698935         | 27432414            | 99.04%          | 12.5688              | bait               | SAMN19355146            |
| Ac-F1-M07          | 20557860         | 19095236            | 92.89%          | 8.881                | bait               | SAMN19355147            |
| Ac-F1-M08          | 27903134         | 27445157            | 98.36%          | 12.761               | bait               | SAMN19355148            |
| Ac-F1-M09          | 23811781         | 23565913            | 98.97%          | 10.9727              | bait               | SAMN19355149            |
| Ac-F1-M10          | 65352121         | 21929765            | 33.56%          | 9.7912               | bait               | SAMN19355162            |
| Ac-F1-M11          | 27270106         | 26897263            | 98.63%          | 12.3656              | bait               | SAMN19355140            |
| Ac-F1-M13          | 37059248         | 36766383            | 99.21%          | 17.0231              | bait               | SAMN19355142            |
| Ac-F1-M14          | 26938951         | 26712829            | 99.16%          | 12.3178              | bait               | SAMN19355143            |
| Ac-F1-M15          | 35379886         | 35068829            | 99.12%          | 16.0302              | bait               | SAMN19355144            |

**Supplementary Table 2. *Anopheles stephensi* whole genome sequencing information.**

Number of raw reads, mapped reads and NCBI accession number for each sample.

| <b>Sample Name</b> | <b>Raw Reads</b> | <b>Mapped Reads</b> | <b>% Mapped</b> | <b>Mean Coverage</b> | <b>Sample type</b> | <b>Accession Number</b> |
|--------------------|------------------|---------------------|-----------------|----------------------|--------------------|-------------------------|
| As19-STE2-PF1      | 77776380         | 76593984            | 98.48%          | 40.7268              | parent             | SAMN19349657            |
| As19-STE2-PM2      | 75436497         | 74687505            | 99.01%          | 38.5068              | parent             | SAMN19349659            |
| As19-STE2-PM1      | 52404190         | 51855823            | 98.95%          | 27.9091              | parent             | SAMN19349658            |
| As19-STE2-F01      | 66954375         | 66137779            | 98.78%          | 34.7842              | focal              | SAMN19349627            |
| As19-STE2-F07      | 69430894         | 68597695            | 98.80%          | 35.8084              | focal              | SAMN19349629            |
| As19-STE2-F12      | 70532115         | 69703538            | 98.83%          | 36.2458              | focal              | SAMN19349632            |
| As19-STE2-F14      | 65718226         | 64881492            | 98.73%          | 34.3319              | focal              | SAMN19349633            |
| As19-STE2-F18      | 57651886         | 57022285            | 98.91%          | 30.1536              | focal              | SAMN19349635            |
| As19-STE2-F19      | 61559874         | 60847229            | 98.84%          | 32.1884              | focal              | SAMN19349636            |
| As19-STE2-F23      | 67998247         | 67218696            | 98.85%          | 35.3671              | focal              | SAMN19349640            |
| As19-STE2-M02      | 78965451         | 78427509            | 99.32%          | 41.2406              | focal              | SAMN19349644            |
| As19-STE2-M08      | 88316059         | 87728363            | 99.33%          | 46.034               | focal              | SAMN19349648            |
| As19-STE2-M09      | 64077766         | 63573092            | 99.21%          | 33.169               | focal              | SAMN19349649            |
| As19-STE2-M12      | 77656885         | 77106199            | 99.29%          | 41.0428              | focal              | SAMN19349652            |
| As19-STE2-M15      | 73758339         | 73257163            | 99.32%          | 39.0162              | focal              | SAMN19349655            |
| As19-STE2-M16      | 67535981         | 67032143            | 99.25%          | 35.2754              | focal              | SAMN19349656            |
| As19-STE2-F06      | 31303280         | 30901421            | 98.72%          | 15.8275              | bait               | SAMN19349628            |
| As19-STE2-F08      | 31135114         | 30751733            | 98.77%          | 15.7036              | bait               | SAMN19349630            |
| As19-STE2-F11      | 31404047         | 30941221            | 98.53%          | 15.978               | bait               | SAMN19349631            |
| As19-STE2-F15      | 31392254         | 30968507            | 98.65%          | 16.0192              | bait               | SAMN19349634            |
| As19-STE2-F20      | 29725268         | 29348859            | 98.73%          | 15.0866              | bait               | SAMN19349637            |
| As19-STE2-F21      | 29588753         | 29216355            | 98.74%          | 15.3141              | bait               | SAMN19349638            |
| As19-STE2-F22      | 30199414         | 29830130            | 98.78%          | 15.4727              | bait               | SAMN19349639            |
| As19-STE2-F24      | 30484601         | 30110987            | 98.77%          | 15.6666              | bait               | SAMN19349641            |
| As19-STE2-F25      | 30048552         | 29673296            | 98.75%          | 15.2886              | bait               | SAMN19349642            |
| As19-STE2-M01      | 34959253         | 34664794            | 99.16%          | 18.0344              | bait               | SAMN19349643            |
| As19-STE2-M04      | 30760393         | 30517098            | 99.21%          | 15.8295              | bait               | SAMN19349645            |
| As19-STE2-M05      | 38277837         | 37784715            | 98.71%          | 20.1156              | bait               | SAMN19349646            |
| As19-STE2-M07      | 31517930         | 31317055            | 99.36%          | 16.4468              | bait               | SAMN19349647            |
| As19-STE2-M10      | 33896520         | 33633579            | 99.22%          | 17.6547              | bait               | SAMN19349650            |
| As19-STE2-M11      | 32227024         | 32004439            | 99.31%          | 16.9569              | bait               | SAMN19349651            |
| As19-STE2-M13      | 32302724         | 32006474            | 99.08%          | 16.9231              | bait               | SAMN19349653            |
| As19-STE2-M14      | 35161264         | 34916379            | 99.30%          | 18.3509              | bait               | SAMN19349654            |

**Supplementary Table 3. List of candidate *de novo* mutations detected in *A. coluzzii*.**

Genomic position, reference (Ref.) and alternate (Alt.) alleles, focal offspring where candidate mutation was detected, alternate allele frequency, allele and read depth mean for parents and focal offspring.

| Chromosome,<br>Position | Allele |      | Focal<br>offspring | Alt.<br>Frequency | Allele Depth |      | Read Depth Mean |             |
|-------------------------|--------|------|--------------------|-------------------|--------------|------|-----------------|-------------|
|                         | Ref.   | Alt. |                    |                   | Ref.         | Alt. | Parents         | Focal       |
| 2L, 1679821             | C      | T    | F1-F01             | 0.308             | 9            | 4    | 55.0            | 31.4        |
| 2L, 21501855            | A      | G    | F1-M01             | 0.273             | 16           | 6    | 35.0            | 28.1        |
| 2L, 38173388            | G      | C    | F1-F01             | 0.527             | 26           | 29   | 30.0            | 31.9        |
| 2L, 38173394            | G      | C    | F1-F01             | 0.527             | 26           | 29   | 30.0            | 31.6        |
| 2L, 38173403            | T      | C    | F1-F01             | 0.491             | 28           | 27   | 30.5            | 30.3        |
| 3L, 10978191            | G      | A    | F1-M04             | 0.529             | 8            | 9    | 31.5            | 26.9        |
| 3L, 30182152            | A      | C    | F1-M05             | 0.348             | 15           | 8    | 31.5            | 28.2        |
| 3L, 32059779            | C      | T    | F1-F09             | 0.389             | 11           | 7    | 26.5            | 17.8        |
| <b>All site's Mean</b>  |        |      |                    | <b>0.424</b>      |              |      | <b>33.8</b>     | <b>28.3</b> |

**Supplementary Table 4. List of candidate *de novo* mutations detected in *A. stephensi*.**

Genomic position, reference (Ref.) and alternate (Alt.) alleles, focal offspring where candidate mutation was detected, alternate allele frequency, allele and read depth mean for parents and focal offspring.

| Chromosome,<br>Position | Allele |      | Focal<br>Offspring | Alt.<br>Frequency | Allele Depth |      | Read Depth Mean |             |
|-------------------------|--------|------|--------------------|-------------------|--------------|------|-----------------|-------------|
|                         | Ref.   | Alt. |                    |                   | Ref.         | Alt. | Parents         | Focal       |
| X, 1692026              | C      | T    | As19-STE2-F23      | 0.3077            | 18           | 8    | 22.0            | 18.62       |
| X, 14920753             | C      | T    | As19-STE2-M15      | 1                 | 0            | 12   | 27.0            | 17.85       |
| 2, 29186821             | T      | A    | As19-STE2-M09      | 0.5588            | 15           | 19   | 39.5            | 30.85       |
| 2, 42294046             | C      | A    | As19-STE2-M12      | 0.2973            | 26           | 11   | 30.0            | 27.38       |
| 3, 6181251              | G      | C    | As19-STE2-M02      | 0.5185            | 13           | 14   | 26.5            | 26.31       |
| 3, 56020205             | G      | T    | As19-STE2-F14      | 0.4737            | 10           | 9    | 35.5            | 27.15       |
| <b>All site's mean</b>  |        |      |                    | <b>0.562</b>      |              |      | <b>30.1</b>     | <b>24.7</b> |

**Supplementary Table 5. Site distribution by read depth in *A. coluzzii*.** Empirical distribution of number of sites by read depth ranging from 2 to 100.

| Depth | Sites | Depth | Sites |
|-------|-------|-------|-------|
| 2     | 1171  | 48    | 701   |
| 3     | 4384  | 49    | 537   |
| 4     | 10254 | 50    | 386   |
| 5     | 19351 | 51    | 309   |
| 6     | 30821 | 52    | 243   |
| 7     | 43500 | 53    | 174   |
| 8     | 56178 | 54    | 130   |
| 9     | 66656 | 55    | 74    |
| 10    | 74891 | 56    | 64    |
| 11    | 79701 | 57    | 59    |
| 12    | 82616 | 58    | 37    |
| 13    | 82162 | 59    | 31    |
| 14    | 79924 | 60    | 20    |
| 15    | 76352 | 61    | 21    |
| 16    | 71500 | 62    | 8     |
| 17    | 66657 | 63    | 10    |
| 18    | 62090 | 64    | 2     |
| 19    | 57638 | 65    | 3     |
| 20    | 53817 | 66    | 6     |
| 21    | 50530 | 67    | 4     |
| 22    | 46591 | 68    | 6     |
| 23    | 43938 | 69    | 3     |
| 24    | 41322 | 70    | 4     |
| 25    | 38727 | 71    | 3     |

|    |       |     |   |
|----|-------|-----|---|
| 26 | 36204 | 73  | 4 |
| 27 | 33337 | 74  | 3 |
| 28 | 30440 | 76  | 1 |
| 29 | 28159 | 77  | 1 |
| 30 | 25392 | 79  | 1 |
| 31 | 22701 | 80  | 1 |
| 32 | 19948 | 82  | 1 |
| 33 | 17734 | 83  | 1 |
| 34 | 15308 | 84  | 4 |
| 35 | 13017 | 86  | 2 |
| 36 | 11092 | 87  | 2 |
| 37 | 9279  | 88  | 2 |
| 38 | 7675  | 89  | 2 |
| 39 | 6483  | 90  | 3 |
| 40 | 5202  | 91  | 5 |
| 41 | 4290  | 93  | 3 |
| 42 | 3502  | 94  | 1 |
| 43 | 2708  | 95  | 3 |
| 44 | 2138  | 96  | 4 |
| 45 | 1590  | 98  | 1 |
| 46 | 1236  | 99  | 5 |
| 47 | 925   | 100 | 4 |

---



**Supplementary Table 6. Summary of synthetic mutation analysis and estimation of mutation rates for *A. coluzzii* and *A. stephensi*. Synthetic mutations (SMs).**

| Category                                                      |       | <i>Anopheles coluzzii</i> | <i>Anopheles stephensi</i> |
|---------------------------------------------------------------|-------|---------------------------|----------------------------|
| SMs introduced                                                |       | 10000                     | 13000                      |
| SMs in biallelic sites                                        |       | 8903                      | 11525                      |
| SMs in reference homozygous parents (i)                       |       | 8788                      | 11453                      |
| SMs in pure sites and called in all focal offspring (ii, iii) |       | 8070                      | 10014                      |
| SMs detected                                                  |       | 7662                      | 9563                       |
| Haploid callable sites                                        |       | 1945418861                | 2439887457                 |
| Estimated mutation rate ( $\mu$ )                             |       | $1.01 \times 10^{-9}$     | $1.39 \times 10^{-9}$      |
| 95% confidence level                                          | Lower | $2.07 \times 10^{-10}$    | $4.51 \times 10^{-10}$     |
|                                                               | Upper | $2.93 \times 10^{-9}$     | $3.25 \times 10^{-9}$      |
